# Supplementary material for: Field-induced SIM behaviour in early lanthanide(iii) organophosphates containing 18-crown-6
Source: Royal Society of Chemistry journal article supplement (doi:10.1039/d3dt01206a), 2023-01-01
Supplement: d3dt01206a1.pdf [file d3dt01206a1.pdf]

**Electronic supporting information for**

**Field-Induced SIM Behaviour in Early Lanthanide(III)  
Organophosphates Incorporating 18-crown-6**

Aditya Borah, Sourav Dey, Sandeep K. Gupta, Gopalan Rajaraman and Ramaswamy  
Murugavel\*

**Infrared spectroscopy of 1-5:** The FTIR spectra of all the five compounds were recorded as KBr diluted disks (Figure S1). The broad absorption peaks centred at around  $2300\text{ cm}^{-1}$  is due to the presence of free P-OH group present in the molecular structures. The strong absorption peaks that appear in the region of  $1200\text{-}1150\text{ cm}^{-1}$  and  $1000\text{-}850\text{ cm}^{-1}$  are due to the presence of P=O stretching and M-O=P and M-O-P symmetric and asymmetric vibrations respectively. The broad peaks near the region of  $3500\text{ cm}^{-1}$  are originating from the water molecules. Peaks around  $2950$  and  $2870\text{ cm}^{-1}$  are due to symmetric and asymmetric vibration of the C-H bond present in the organic part of the ligand.

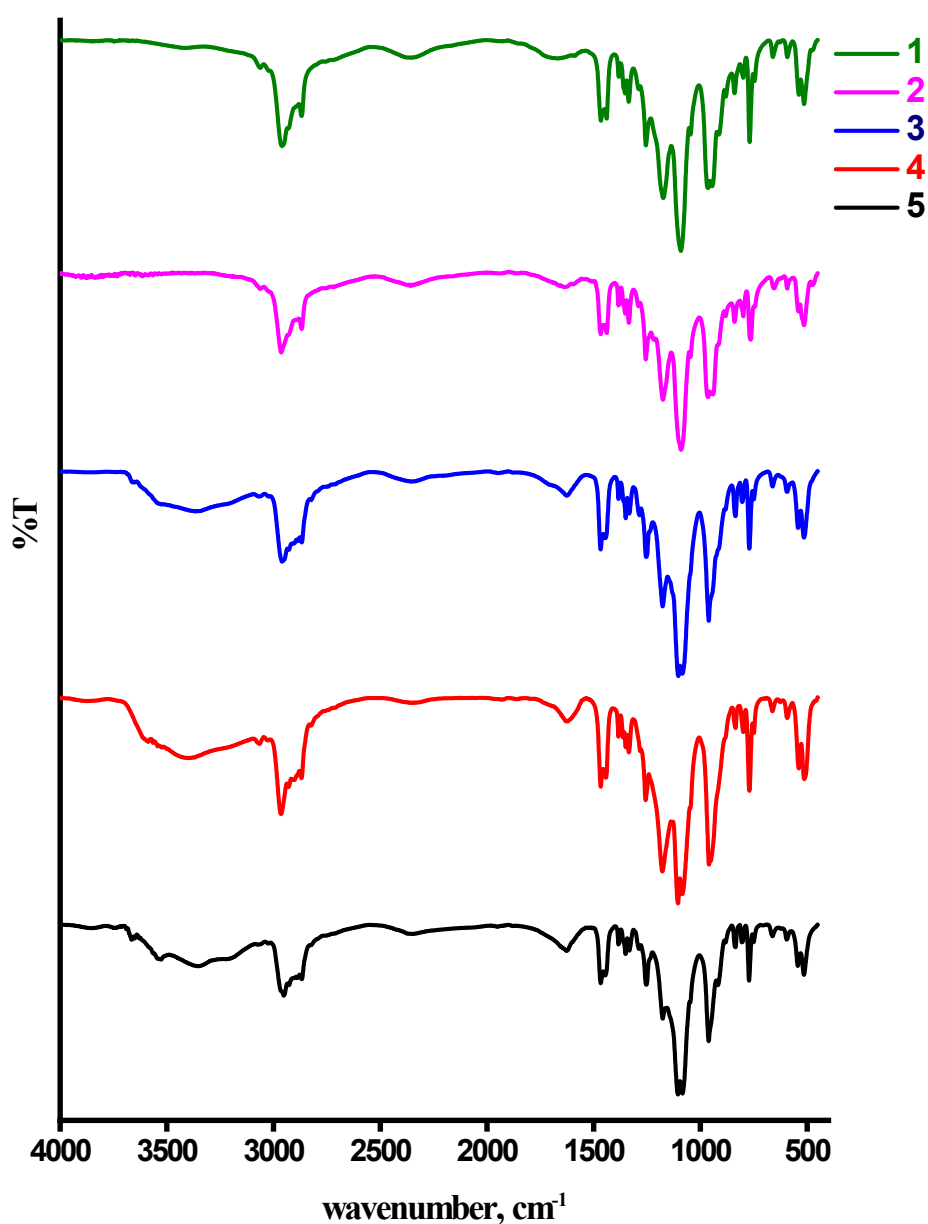

**Figure S1.** FTIR spectra of 1-5 (as disc diluted in KBr)

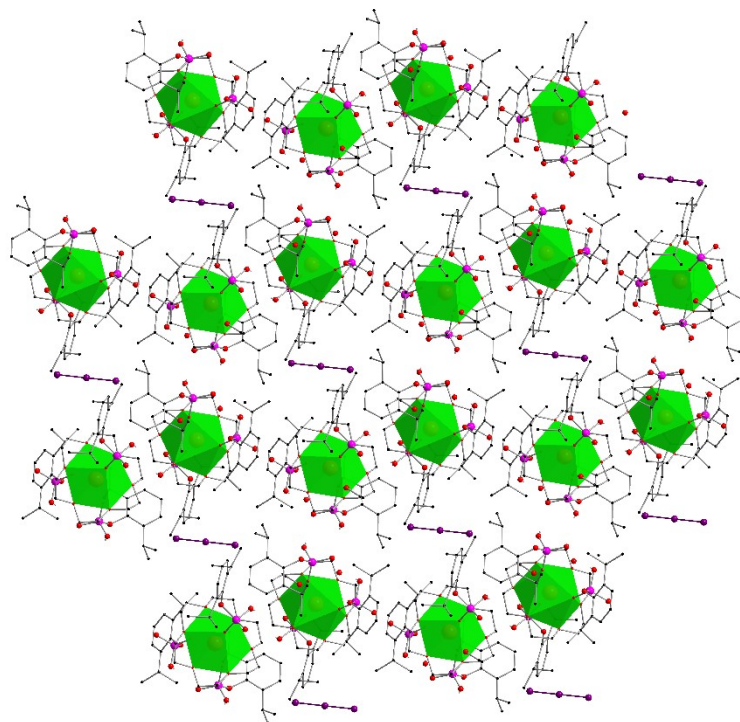

**Figure S2.** Lattice arrangement of **1**. H atoms are omitted for clarity, disordered  $I_3$  ions with largest occupancy is shown here. Colour code: Ce, orange; P, pink; O, red; black, carbon and I, violet. Due to the bulkiness in the phenyl rings and lattice triiodide anions and solvent molecules, Ce centres are separated by at least 10.097 Å.

**Table S1:** Selected bond lengths (Å) and bond angles (°) in **1**.

|           |           |           |           |           |           |
|-----------|-----------|-----------|-----------|-----------|-----------|
| Ce1-O1    | 2.422(5)  | O2-Ce1-O6 | 88.94(7)  | O4-Ce1-O7 | 151.07(8) |
| Ce1-O2    | 2.399(5)  | O2-Ce1-O7 | 72.16(7)  | O6-Ce1-O5 | 60.25(8)  |
| Ce1-O3    | 2.330(5)  | O2-Ce1-O8 | 71.66(8)  | O6-Ce1-O7 | 60.13(9)  |
| Ce1-O4    | 2.631(5)  | O2-Ce1-O9 | 88.94(9)  | O6-Ce1-O5 | 60.25(8)  |
| Ce1-O5    | 2.693(5)  | O3-Ce1-O1 | 141.74(8) | O6-Ce1-O7 | 60.13(9)  |
| Ce1-O6    | 2.661(6)  | O3-Ce1-O2 | 141.65(8) | O6-Ce1-O8 | 120.85(9) |
| Ce1-O7    | 2.670(5)  | O3-Ce1-O4 | 76.63(9)  | O7-Ce1-O5 | 112.65(8) |
| Ce1-O8    | 2.668(6)  | O3-Ce1-O5 | 77.65(9)  | O8-Ce1-O5 | 153.55(9) |
| Ce1-O9    | 2.607(6)  | O3-Ce1-O6 | 90.50(2)  | O8-Ce1-O7 | 60.76(9)  |
| O1-Ce1-O4 | 70.25(8)  | O3-Ce1-O7 | 74.46(8)  | O9-Ce1-O4 | 60.40(2)  |
| O1-Ce1-O5 | 69.77(6)  | O3-Ce1-O8 | 75.90(2)  | O6-Ce1-O8 | 120.85(9) |
| O1-Ce1-O6 | 90.36(8)  | O3-Ce1-O9 | 91.80(2)  | O7-Ce1-O5 | 112.65(8) |
| O1-Ce1-O7 | 136.62(8) | O4-Ce1-O5 | 60.57(9)  | O9-Ce1-O6 | 177.68(9) |
| O1-Ce1-O8 | 134.05(8) | O4-Ce1-O6 | 120.80(9) | O9-Ce1-O7 | 120.0(2)  |
| O1-Ce1-O9 | 88.3(2)   | O4-Ce1-O7 | 151.08(8) | O9-Ce1-O8 | 59.2(2)   |
| O2-Ce1-O1 | 76.64(6)  | O4-Ce1-O8 | 111.50(2) | O9-Ce1-O5 | 120.9(2)  |
| O2-Ce1-O4 | 134.57(7) | O4-Ce1-O6 | 120.80(9) |           |           |
| O2-Ce1-O5 | 133.10(8) | O4-Ce1-O8 | 111.50(2) |           |           |

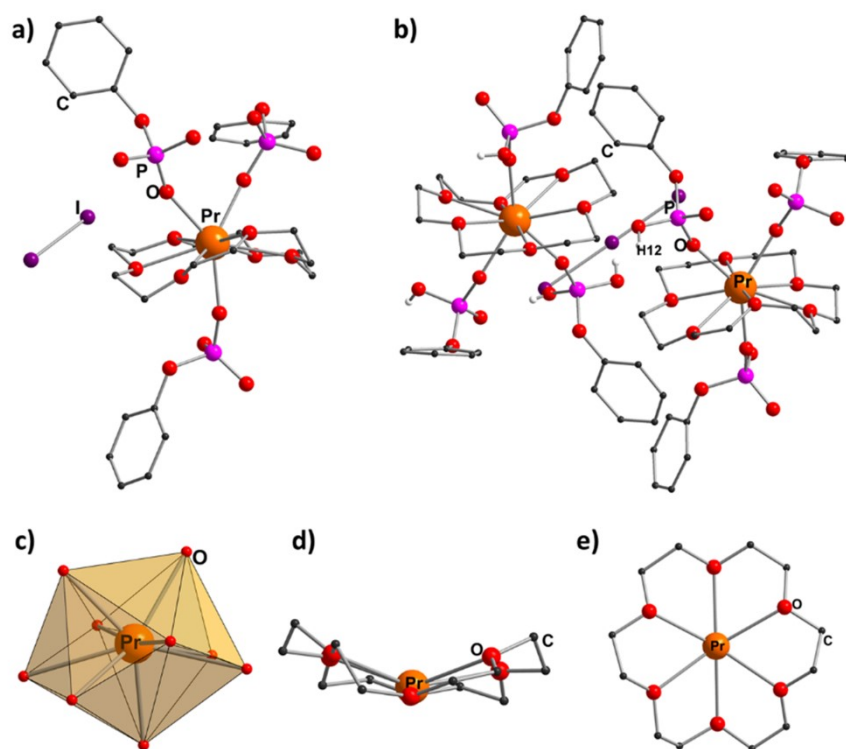

**Figure S3.** Molecular structure of **2**. (a) The asymmetric unit and (b) full molecule of **2**. (c) Muffin shaped coordination polyhedra around the nine-coordinated Pr(III) ion. (d) The side view and (e) top view of the binding mode of 18-crown-6 to Ce(III) centre, coordinates in a wavy fashion. The isopropyl groups on the phenyl ring, lattice solvent molecules and the hydrogen atoms (except H12 present in the spatial position) are omitted for clarity.

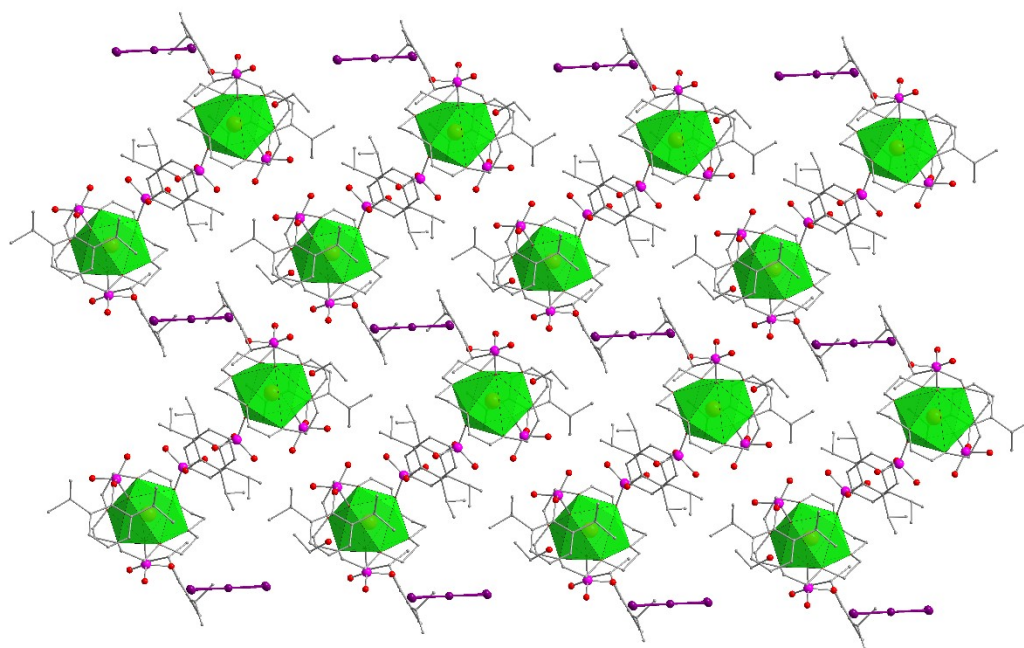

**Figure S4.** Lattice arrangement of **2**. H atoms are omitted for clarity. Colour code: Pr, orange; P, pink; O, red; black, carbon and I, violet. Due to the bulkiness in the phenyl rings of

organophosphates and lattice triiodide anions and lattice solvent molecules, Pr(III) centres are separated by at least 9.83 Å.

**Table S2:** Selected bond lengths (Å) and bond angles (°) in **2**

|           |           |            |           |             |           |
|-----------|-----------|------------|-----------|-------------|-----------|
| Pr1-O1    | 2.649(2)  | O4-Pr1-O3  | 61.07(8)  | O7-Pr1-O15  | 141.69(8) |
| Pr1-O2    | 2.608(3)  | O4-Pr1-O5  | 60.86(8)  | O11-Pr1-O1  | 69.33(8)  |
| Pr1-O3    | 2.627(3)  | O5-Pr1-O1  | 114.07(8) | O11-Pr1-O2  | 75.03(10) |
| Pr1-O4    | 2.620(2)  | O6-Pr1-O1  | 61.85(8)  | O11-Pr1-O3  | 82.59(9)  |
| Pr1-O5    | 2.645(2)  | O6-Pr1-O2  | 123.39(9) | O11-Pr1-O4  | 134.87(8) |
| Pr1-O6    | 2.584(2)  | O6-Pr1-O3  | 169.74(9) | O11-Pr1-O5  | 138.29(8) |
| Pr1-O7    | 2.315(2)  | O6-Pr1-O4  | 122.36(8) | O11-Pr1-O6  | 89.50(9)  |
| Pr1-O11   | 2.410(2)  | O6-Pr1-O5  | 61.55(8)  | O15-Pr1-O1  | 132.25(8) |
| Pr1-O15   | 2.361(2)  | O7-Pr1-O1  | 76.48(8)  | O15-Pr1-O2  | 138.60(9) |
| O2-Pr1-O3 | 60.80(1)  | O7-Pr1-O2  | 73.10(9)  | O15-Pr1-O3  | 86.03(9)  |
| O2-Pr1-O4 | 105.28(1) | O7-Pr1-O3  | 100.22(9) | O15-Pr1-O4  | 74.96(8)  |
| O2-Pr1-O5 | 145.33(9) | O7-Pr1-O4  | 75.38(8)  | O15-Pr1-O5  | 72.00(8)  |
| O3-Pr1-O1 | 120.54(9) | O7-Pr1-O5  | 72.60(8)  | O15-Pr1-O6  | 85.79(8)  |
| O3-Pr1-O5 | 121.34(8) | O7-Pr1-O6  | 90.04(8)  | O15-Pr1-O11 | 76.83(8)  |
| O4-Pr1-O1 | 151.51(8) | O7-Pr1-O11 | 141.28(8) |             |           |

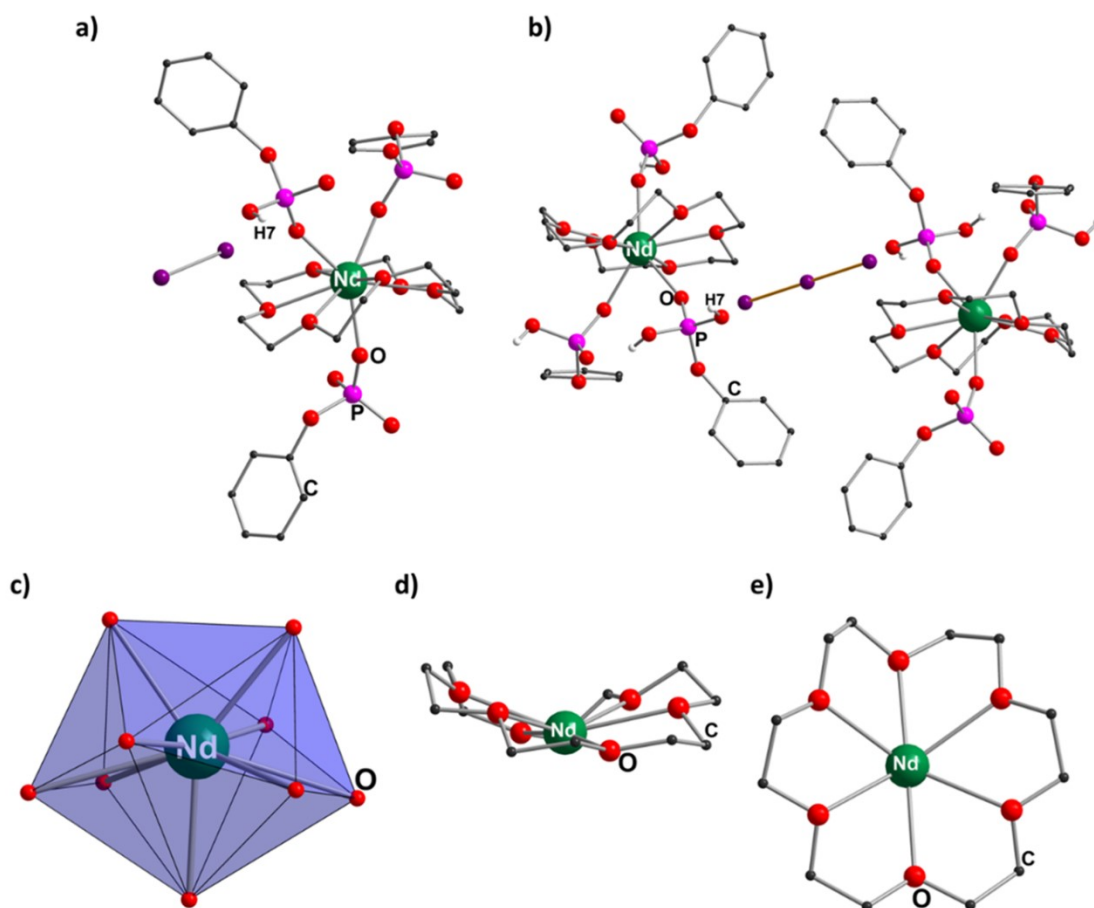

**Figure S5.** Molecular structure of 3. (a) The asymmetric unit and (b) full molecule of 3. (c) Muffin shaped coordination polyhedra around the nine-coordinated Nd(III) ion. (d) The side view and (e) top view of the binding mode of 18-crown-6 to Nd(III) centre, coordinates in a wavy fashion. The isopropyl groups on the phenyl ring, lattice solvent molecules and the hydrogen atoms (except H7 present in the spatial position) are omitted for clarity.

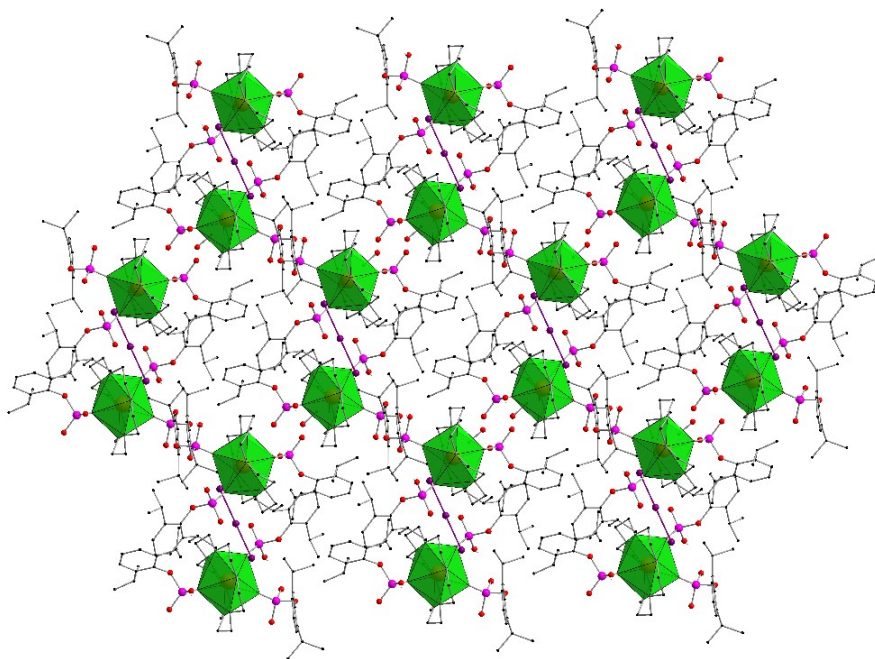



**Figure S6.** Lattice arrangement of **3**. H atoms are omitted for clarity. Colour code: Nd, orange; P, pink; O, red; black, carbon and I, violet. Due to the bulkiness in the phenyl rings of organophosphates and lattice triiodide anions and lattice solvent molecules, Nd(III) centres are separated by at least 9.86 Å.

**Table S3:** Selected bond lengths (Å) and bond angles (°) in **3**.

|            |          |             |           |             |           |
|------------|----------|-------------|-----------|-------------|-----------|
| Nd1-O1     | 2.317(4) | O9-Nd1-O13  | 72.08(5)  | O9-Nd1-O5   | 76.08(6)  |
| Nd1-O5     | 2.387(4) | O9-Nd1-O14  | 75.47(7)  | O15-Nd1-O17 | 120.57(6) |
| Nd1-O9     | 2.351(4) | O9-Nd1-O15  | 89.46(7)  | O16-Nd1-O13 | 146.99(4) |
| Nd1-O13    | 2.656(5) | O9-Nd1-O16  | 138.29(5) | O16-Nd1-O14 | 107.80(6) |
| Nd1-O14    | 2.623(5) | O9-Nd1-O17  | 129.47(6) | O16-Nd1-O17 | 61.28(5)  |
| Nd1-O15    | 2.577(5) | O9-Nd1-O18  | 82.80(5)  | O17-Nd1-O13 | 113.90(4) |
| Nd1-O16    | 2.588(5) | O14-Nd1-O13 | 60.78(5)  | O18-Nd1-O13 | 61.32(5)  |
| Nd1-O17    | 2.628(5) | O14-Nd1-O17 | 153.58(5) | O18-Nd1-O14 | 121.86(5) |
| Nd1-O18    | 2.575(5) | O15-Nd1-O13 | 120.84(6) | O18-Nd1-O15 | 170.82(5) |
| O5-Nd1-O17 | 70.04(5) | O15-Nd1-O14 | 60.24(6)  | O18-Nd1-O16 | 123.39(5) |
| O5-Nd1-O18 | 91.33(5) | O15-Nd1-O16 | 60.47(6)  | O18-Nd1-O17 | 62.16(4)  |

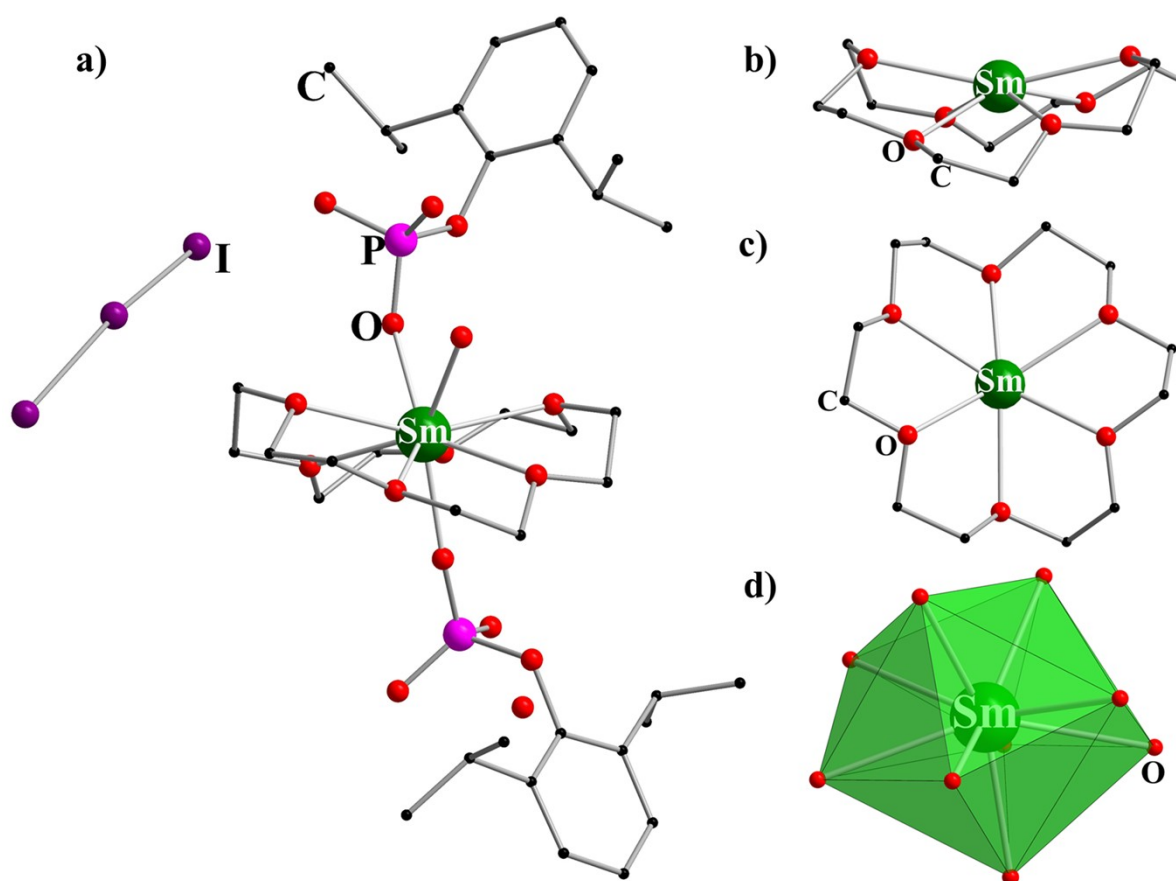

**Figure S7.** (a) Molecular structure of  $[\{\text{Sm}(18\text{-crown-6})(\text{dippH})_2(\text{H}_2\text{O})\} \cdot \{\text{I}_3\}]$  (**4**). The hydrogen atoms are omitted for clarity. (b) The side view and (c) the top view of the binding mode of 18-crown-6 to the Sm(III) centre, coordinates in a wavy fashion. (d) The coordination environment of nine-coordinated Sm(III) ion with Muffin shaped geometry.

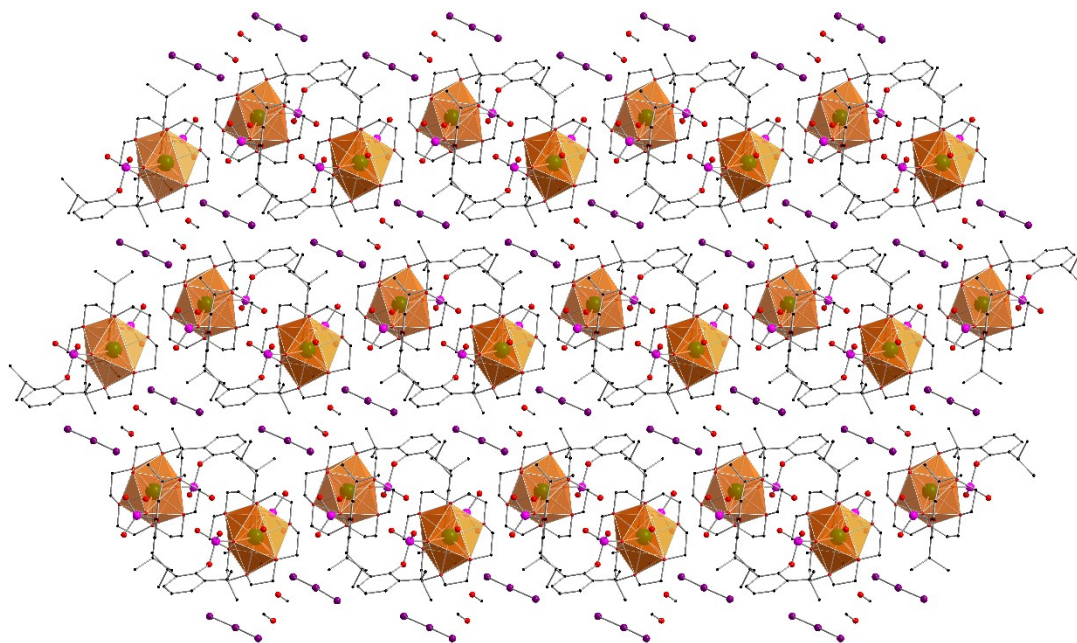

**Figure S8.** Lattice arrangement of **4**. H atoms are omitted for clarity. Colour code: Sm, dark blue; P, pink; O, red; black, carbon and I, violet. Due to the bulkiness in the phenyl rings of organophosphates and lattice triiodide anions and lattice solvent molecules, Sm(III) centres are separated by at least 10.12 Å.

**Table S4:** Selected bond lengths (Å) and bond angles (°) in **4**

|            |           |            |            |             |            |
|------------|-----------|------------|------------|-------------|------------|
| Sm1-O1     | 2.294(3)  | O1-Sm1-O15 | 133.02(1)  | O10-Sm1-O15 | 62.06(10)  |
| Sm1-O5     | 2.277(3)  | O5-Sm1-O1  | 142.24(1)  | O11-Sm1-O10 | 63.08(10)  |
| Sm1-O9     | 2.403(3)  | O5-Sm1-O9  | 140.37(1)  | O11-Sm1-O13 | 122.75(10) |
| Sm1-O10    | 2.574(3)  | O5-Sm1-O10 | 79.14(11)  | O11-Sm1-O14 | 155.37(11) |
| Sm1-O11    | 2.554(3)  | O5-Sm1-O11 | 114.52(11) | O11-Sm1-O15 | 121.43(10) |
| Sm1-O12    | 2.504(3)  | O5-Sm1-O12 | 79.04(11)  | O12-Sm1-O10 | 104.02(11) |
| Sm1-O13    | 2.572(3)  | O5-Sm1-O13 | 71.64(11)  | O12-Sm1-O11 | 62.88(10)  |
| Sm1-O14    | 2.558(3)  | O5-Sm1-O14 | 90.11(11)  | O12-Sm1-O13 | 63.15(10)  |
| Sm1-O15    | 2.603(3)  | O5-Sm1-O15 | 73.11(10)  | O12-Sm1-O14 | 126.24(10) |
| O1-Sm1-O9  | 74.59(1)  | O9-Sm1-O10 | 76.57(11)  | O12-Sm1-O15 | 150.65(10) |
| O1-Sm1-O10 | 134.14(1) | O9-Sm1-O11 | 81.10(11)  | O13-Sm1-O10 | 149.71(10) |
| O1-Sm1-O11 | 77.75(1)  | O9-Sm1-O12 | 137.22(11) | O13-Sm1-O15 | 114.78(10) |
| O1-Sm1-O12 | 75.78(1)  | O9-Sm1-O13 | 132.19(11) | O14-Sm1-O10 | 125.51(10) |
| O1-Sm1-O13 | 72.03(1)  | O9-Sm1-O14 | 79.33(11)  | O14-Sm1-O13 | 63.44(10)  |
| O1-Sm1-O14 | 82.72(1)  | O9-Sm1-O15 | 67.94(11)  | O14-Sm1-O15 | 63.68(10)  |



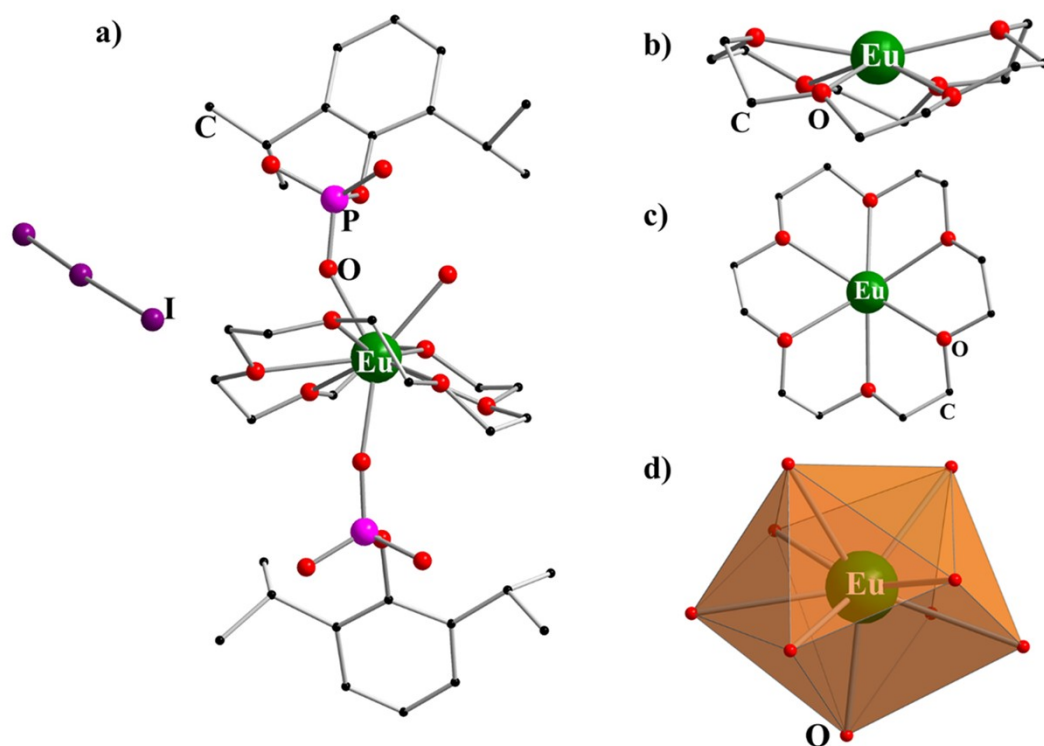

**Figure S9.** (a) Molecular structure of  $[\{\text{Eu}(18\text{-crown-6})(\text{dippH})_2(\text{H}_2\text{O})\} \cdot \{\text{I}_3\}]$  (**5**) (Only one of the two **5** present in the asymmetric unit is shown). The hydrogen atoms are omitted for clarity. (b) The side view and (c) the top view of the binding mode of 18-crown-6 to the Eu(III) centre, coordinates in a wavy fashion. (d) The coordination environment of nine-coordinated Eu(III) ion with Muffin shaped geometry.

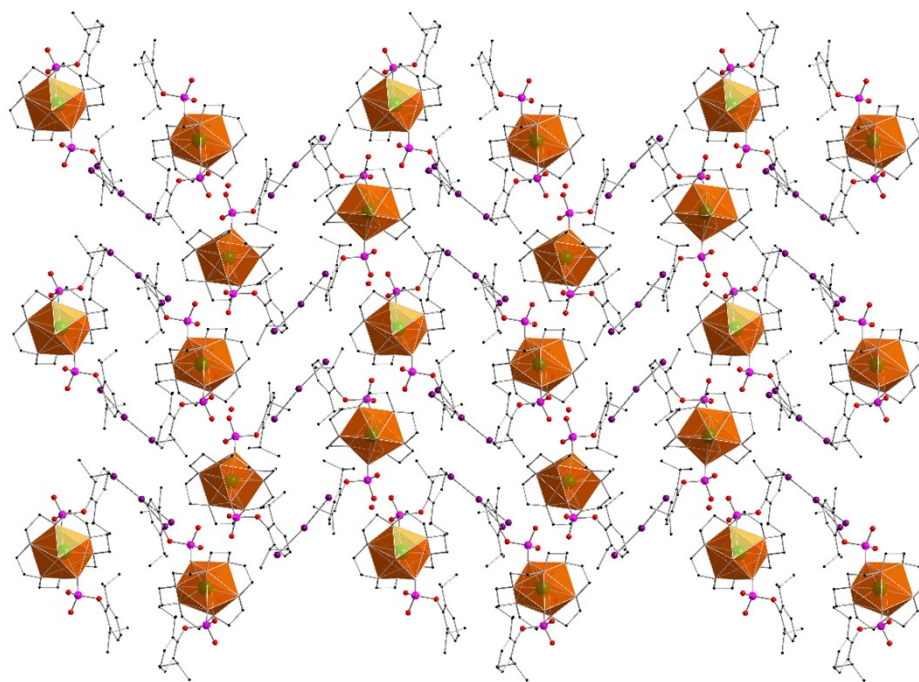

**Figure S10.** Lattice arrangement of **5**. H atoms are omitted for clarity. Colour code: Eu, dark blue; P, pink; O, red; black, carbon and I, violet. Due to the bulkiness in the phenyl rings of

organophosphates and lattice triiodide anions and lattice solvent molecules, Eu(III) centres are separated by at least 10.84 Å.

**Table S5:** Selected bond lengths (Å) and bond angles (°) in **5**.

|             |          |              |          |              |          |
|-------------|----------|--------------|----------|--------------|----------|
| Eu1-O1      | 2.587(1) | O6- Eu1-O13  | 76.0(4)  | O16- Eu2-O26 | 73.5(3)  |
| Eu1-O5      | 2.366(1) | O6- Eu1-O14  | 78.2(4)  | O20- Eu2-O21 | 82.3(4)  |
| Eu1-O6      | 2.227(9) | O6- Eu1-O15  | 76.1(4)  | O20-Eu2-O22  | 74.7(4)  |
| Eu1-O10     | 2.285(9) | O10- Eu1-O1  | 71.3(4)  | O20-Eu2-O23  | 69.7(3)  |
| Eu1-O11     | 2.566(9) | O10- Eu1-O5  | 74.8(4)  | O20-Eu2-O24  | 80.4(3)  |
| Eu1-O12     | 2.493(2) | O10- Eu1-O11 | 70.4(3)  | O20-Eu2-O25  | 133.3(3) |
| Eu1-O13     | 2.569(1) | O10- Eu1-O12 | 87.1(4)  | O20-Eu2-O26  | 136.3(3) |
| Eu1-O14     | 2.597(2) | O10- Eu1-O13 | 136.0(4) | O21-Eu2-O22  | 63.2(3)  |
| Eu1-O15     | 2.556(2) | O10- Eu1-O14 | 129.5(4) | O21-Eu2-O23  | 122.7(3) |
| Eu2-O16     | 2.283(9) | O10- Eu1-O15 | 75.5(4)  | O21-Eu2-O25  | 123.0(3) |
| Eu2-O20     | 2.373(9) | O11- Eu1-O1  | 117.7(4) | O21-Eu2-O26  | 62.4(3)  |
| Eu2-O21     | 2.532(9) | O11- Eu1-O13 | 122.1(4) | O22-Eu2-O25  | 149.8(3) |
| Eu2-O22     | 2.582(9) | O11- Eu1-O14 | 150.6(4) | O23-Eu2-O22  | 61.7(3)  |
| Eu2-O23     | 2.577(9) | O12- Eu1-O1  | 153.9(4) | O23-Eu2-O25  | 112.2(3) |
| Eu2-O24     | 2.521(9) | O12- Eu1-O11 | 65.7(4)  | O24-Eu2-O21  | 157.9(3) |
| Eu2-O25     | 2.612(9) | O12- Eu1-O13 | 66.5(4)  | O24-Eu2-O22  | 124.3(3) |
| Eu2-O26     | 2.570(9) | O12- Eu1-O14 | 128.4(4) | O24-Eu2-O23  | 63.0(3)  |
| Eu2-O27     | 2.261(9) | O12- Eu1-O15 | 129.3(5) | O24-Eu2-O25  | 62.8(3)  |
| O1- Eu1-O14 | 62.7(4)  | O13- Eu1-O1  | 119.8(4) | O24-Eu2-O26  | 124.6(3) |
| O5- Eu1-O1  | 81.5(5)  | O13- Eu1-O14 | 62.0(4)  | O26-Eu2-O22  | 107.4(4) |
| O5- Eu1-O11 | 130.6(5) | O15- Eu1-O1  | 60.3(5)  | O26-Eu2-O23  | 151.0(3) |
| O5- Eu1-O12 | 78.7(5)  | O15- Eu1-O11 | 63.6(5)  | O26-Eu2-O25  | 62.5(3)  |
| O5- Eu1-O13 | 66.2(4)  | O15- Eu1-O13 | 148.4(4) | O27-Eu2-O16  | 142.6(3) |
| O5- Eu1-O14 | 78.7(4)  | O15- Eu1-O14 | 97.8(4)  | O27-Eu2-O20  | 142.0(3) |
| O5- Eu1-O15 | 137.3(4) | O16- Eu2-O20 | 75.3(3)  | O27-Eu2-O21  | 104.3(3) |
| O6-Eu1-O1   | 113.7(4) | O16- Eu2-O21 | 79.2(3)  | O27-Eu2-O22  | 75.4(3)  |
| O6-Eu1-O5   | 141.7(3) | O16- Eu2-O22 | 134.2(3) | O27-Eu2-O23  | 75.7(3)  |
| O6-Eu1-O10  | 142.6(3) | O16- Eu2-O23 | 134.3(3) | O27-Eu2-O24  | 97.8(3)  |
| O6- Eu1-O11 | 75.3(3)  | O16- Eu2-O24 | 83.2(3)  | O27-Eu2-O25  | 74.5(3)  |
| O6- Eu1-O12 | 92.4(4)  | O16- Eu2-O25 | 72.8(3)  | O27-Eu2-O26  | 75.5(3)  |

**Table S6:** Crystal Data and Structure Refinement Details for 1-5

| Identification code                            | 1                                                                                                 | 2                                                                                                  | 3                                                                                                 | 4                                                                                      | 5                                                                               |
|------------------------------------------------|---------------------------------------------------------------------------------------------------|----------------------------------------------------------------------------------------------------|---------------------------------------------------------------------------------------------------|----------------------------------------------------------------------------------------|---------------------------------------------------------------------------------|
| Empirical formula                              | C <sub>98</sub> H <sub>155</sub> Ce <sub>2</sub> I <sub>3</sub> O <sub>38</sub><br>P <sub>6</sub> | C <sub>100</sub> H <sub>163</sub> I <sub>3</sub> O <sub>38</sub> P <sub>6</sub><br>Pr <sub>2</sub> | C <sub>97</sub> H <sub>160</sub> I <sub>3</sub> Nd <sub>2</sub><br>O <sub>37</sub> P <sub>6</sub> | C <sub>37</sub> H <sub>68</sub> I <sub>2.38</sub> O <sub>17</sub> P <sub>2</sub><br>Sm | C <sub>37</sub> H <sub>62</sub> EuI <sub>3</sub> O <sub>17</sub> P <sub>2</sub> |
| Formula weight                                 | 2787.97                                                                                           | 2821.63                                                                                            | 2773.24                                                                                           | 1298.59                                                                                | 1373.46                                                                         |
| Temperature/K                                  | 150.0                                                                                             | 150.0                                                                                              | 150.0                                                                                             | 150.0                                                                                  | 150.0                                                                           |
| Crystal system                                 | Triclinic                                                                                         | Triclinic                                                                                          | Triclinic                                                                                         | Triclinic                                                                              | Triclinic                                                                       |
| Space group                                    | $\bar{p}1$                                                                                        | $\bar{p}1$                                                                                         | $\bar{p}1$                                                                                        | $\bar{p}1$                                                                             | $\bar{p}1$                                                                      |
| a/Å                                            | 14.6386(3)                                                                                        | 14.3319(2)                                                                                         | 14.3480(8)                                                                                        | 13.0040(8)                                                                             | 12.5932(6)                                                                      |
| b/Å                                            | 15.8305(5)                                                                                        | 15.0410(2)                                                                                         | 15.8035(9)                                                                                        | 13.2938(6)                                                                             | 16.6149(5)                                                                      |
| c/Å                                            | 16.1766(4)                                                                                        | 17.6013(2)                                                                                         | 17.2262(8)                                                                                        | 15.9969(8)                                                                             | 25.0246(9)                                                                      |
| $\alpha$ /°                                    | 108.616(2)                                                                                        | 111.835(6)                                                                                         | 67.693(5)                                                                                         | 76.591(4)                                                                              | 89.081(3)                                                                       |
| $\beta$ /°                                     | 98.084(2)                                                                                         | 90.642(1)                                                                                          | 88.567(4)                                                                                         | 84.307(5)                                                                              | 89.653(3)                                                                       |
| $\gamma$ /°                                    | 106.682(2)                                                                                        | 111.769(4)                                                                                         | 63.094(6)                                                                                         | 73.542(5)                                                                              | 85.828(3)                                                                       |
| Volume/Å <sup>3</sup>                          | 3289.79(6)                                                                                        | 3221.52(8)                                                                                         | 3171.1(3)                                                                                         | 2578.2(2)                                                                              | 5221.4(3)                                                                       |
| Z                                              | 1                                                                                                 | 1                                                                                                  | 1                                                                                                 | 2                                                                                      | 4                                                                               |
| $\rho_{\text{calc}}/\text{cm}^{-3}$            | 1.407                                                                                             | 1.454                                                                                              | 1.452                                                                                             | 1.673                                                                                  | 1.747                                                                           |
| $\mu/\text{mm}^{-1}$                           | 1.529                                                                                             | 1.612                                                                                              | 1.686                                                                                             | 2.684                                                                                  | 3.097                                                                           |
| F(000)                                         | 1412.0                                                                                            | 1434.0                                                                                             | 1407.0                                                                                            | 1288.0                                                                                 | 2688.0                                                                          |
| Crystal size/mm <sup>3</sup>                   | 0.15 × 0.11 ×<br>0.1                                                                              | 0.2 × 0.1 × 0.06                                                                                   | 0.2 × 0.15 ×<br>0.15                                                                              | 0.15 × 0.12 ×<br>0.1                                                                   | 0.15 × 0.11 ×<br>0.1                                                            |
| Radiation                                      | Mo K $\alpha$<br>( $\lambda = 0.71073$ )                                                          | Mo K $\alpha$ ( $\lambda =$<br>0.71073)                                                            | Mo K $\alpha$ ( $\lambda =$<br>0.71073)                                                           | MoK $\alpha$ ( $\lambda =$<br>0.71073)                                                 | MoK $\alpha$ ( $\lambda =$<br>0.71073)                                          |
| 2 $\theta$ range for data<br>collection/°      | 4.546 to 49.994                                                                                   | 4.808 to 50                                                                                        | 4.494 to 50                                                                                       | 3.27 to 54.998                                                                         | 3.242 to 49.998                                                                 |
| Index ranges                                   | -17 ≤ h ≤ 17,<br>-18 ≤ k ≤ 18,<br>-19 ≤ l ≤ 19                                                    | -17 ≤ h ≤ 17, -<br>17 ≤ k ≤ 17, -20<br>≤ l ≤ 20                                                    | -17 ≤ h ≤ 17,<br>-18 ≤ k ≤ 18,<br>-20 ≤ l ≤ 20                                                    | -16 ≤ h ≤ 16, -<br>16 ≤ k ≤ 17, -20<br>≤ l ≤ 20                                        | -14 ≤ h ≤ 14, -<br>19 ≤ k ≤ 19, -29<br>≤ l ≤ 29                                 |
| Reflections<br>collected                       | 100090                                                                                            | 121284                                                                                             | 121941                                                                                            | 66179                                                                                  | 90519                                                                           |
| Independent<br>reflections                     | 11568 [R <sub>int</sub> =<br>0.0954, R <sub>sigma</sub> =<br>0.0556]                              | 11252 [R <sub>int</sub> =<br>0.0456, R <sub>sigma</sub> =<br>0.0184]                               | 11155 [R <sub>int</sub> =<br>0.1030,<br>R <sub>sigma</sub> =<br>0.0489]                           | 11757 [R <sub>int</sub> =<br>0.0559, R <sub>sigma</sub> =<br>0.0420]                   | 18292 [R <sub>int</sub> =<br>0.1362, R <sub>sigma</sub> =<br>0.1214]            |
| Data/restraints/para<br>meters                 | 11568/7/707                                                                                       | 11252/0/703                                                                                        | 11155/0/699                                                                                       | 11757/0/593                                                                            | 18292/38/1127                                                                   |
| Goodness-of-fit on<br>F <sup>2</sup>           | 1.064                                                                                             | 1.045                                                                                              | 1.026                                                                                             | 1.146                                                                                  | 1.077                                                                           |
| Final R indexes<br>[I ≥ 2 $\sigma$ (I)]        | R <sub>1</sub> = 0.0866,<br>wR <sub>2</sub> = 0.2264                                              | R <sub>1</sub> = 0.0353,<br>wR <sub>2</sub> = 0.0896                                               | R <sub>1</sub> = 0.0618,<br>wR <sub>2</sub> = 0.1588                                              | R <sub>1</sub> = 0.0446,<br>wR <sub>2</sub> = 0.1035                                   | R <sub>1</sub> = 0.1008,<br>wR <sub>2</sub> = 0.2028                            |
| Final R indexes [all<br>data]                  | R <sub>1</sub> = 0.1013,<br>wR <sub>2</sub> = 0.2411                                              | R <sub>1</sub> = 0.0368,<br>wR <sub>2</sub> = 0.0911                                               | R <sub>1</sub> = 0.0817,<br>wR <sub>2</sub> = 0.1828                                              | R <sub>1</sub> = 0.0528,<br>wR <sub>2</sub> = 0.1150                                   | R <sub>1</sub> = 0.1557,<br>wR <sub>2</sub> = 0.2410                            |
| Largest diff.<br>peak/hole / e Å <sup>-3</sup> | 1.82/-1.14                                                                                        | 1.84/-0.90                                                                                         | 2.00/-2.27                                                                                        | 2.77/-1.56                                                                             | 2.94/-1.07                                                                      |

**Table S7: Ln-Ln distances in 1-5.**

| <b>Complex</b> | <b>Minimum Ln-Ln distances (Å)</b> |
|----------------|------------------------------------|
| <b>1</b>       | 10.096                             |
| <b>2</b>       | 9.83                               |
| <b>3</b>       | 10.79                              |
| <b>4</b>       | 10.12                              |
| <b>5</b>       | 9.69                               |

**SHAPE analysis of 1-5.** The coordination environment of nine coordinated Ln(III) ions in **1-5** were analysed by SHAPE 2.1 software<sup>1</sup>. Continuous Shape measurements show that the [LnO<sub>9</sub>] cores in all the complexes, **1-5**, have the same geometry around the respective Ln(III) centres with minimal deviation from ideal *C<sub>s</sub>* symmetry, indicating a muffin geometry around it.

**Table S8:** Continuous SHAPE measurements<sup>1</sup> of the coordination polyhedra of Ln(III) ion of type LnO<sub>9</sub> for **1-5**.

| Structure [ML9] | Symmetry             | <b>1</b>     | <b>2</b>     | <b>3</b>     | <b>4</b>     | <b>5</b>     |
|-----------------|----------------------|--------------|--------------|--------------|--------------|--------------|
| EP-9            | D9h                  | 32.161       | 32.066       | 31.959       | 31.858       | 32.493       |
| OPY-9           | C8v                  | 20.66        | 20.673       | 21.131       | 21.190       | 21.336       |
| HBPY-9          | D7h                  | 14.976       | 14.763       | 15.840       | 16.086       | 16.400       |
| JTC-9           | C3v                  | 15.278       | 15.315       | 13.088       | 13.018       | 13.698       |
| JCCU-9          | C4v                  | 6.936        | 7.139        | 8.142        | 8.330        | 7.313        |
| CCU-9           | C4v                  | 6.003        | 6.224        | 7.051        | 7.282        | 6.310        |
| JCSAPR-9        | C4v                  | 5.658        | 5.552        | 4.050        | 3.671        | 3.613        |
| CSAPR-9         | C4v                  | 4.453        | 4.388        | 3.045        | 2.738        | 2.743        |
| JTCTPR-9        | D3h                  | 5.126        | 4.981        | 3.703        | 3.284        | 2.982        |
| TCTPR-9         | D3h                  | 5.520        | 5.421        | 3.969        | 3.600        | 3.190        |
| JTDIC-9         | C3v                  | 11.968       | 12.068       | 11.333       | 11.628       | 11.747       |
| HH-9            | C2v                  | 4.448        | 4.473        | 5.213        | 5.703        | 5.706        |
| <b>MFF-9</b>    | <b>C<sub>s</sub></b> | <b>3.160</b> | <b>3.189</b> | <b>2.334</b> | <b>2.166</b> | <b>2.349</b> |

| <u>Label</u> | <u>Shape</u>                       |
|--------------|------------------------------------|
| EP-9         | Enneagon                           |
| OPY-9        | Octagonal pyramid                  |
| HBPY-9       | Heptagonal bipyramid               |
| JTC-9        | Johnson triangular cupola J3       |
| JCCU-9       | Capped cube J8                     |
| CCU-9        | Spherical-relaxed capped cube      |
| JCSAPR-9     | Capped square antiprism J10        |
| CSAPR-9      | Spherical capped square antiprism  |
| JTCTPR-9     | Tricapped trigonal prism J51       |
| TCTPR-9      | Spherical tricapped trigonal prism |
| JTDIC-9      | Tridiminished icosahedron J63      |
| HH-9         | Hula-hoop                          |
| MFF-9        | Muffin                             |

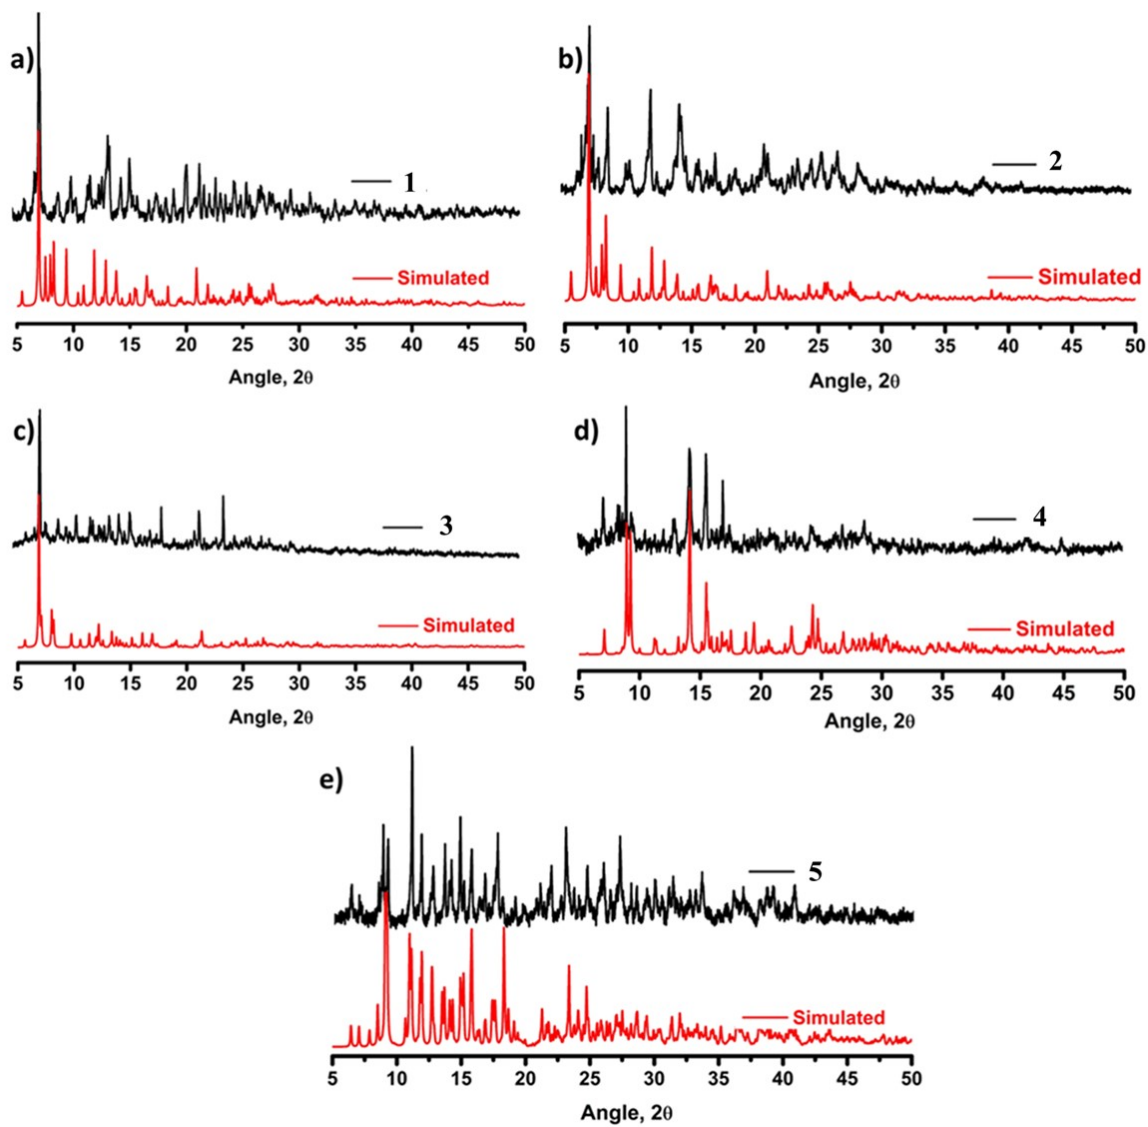

**Figure S11:** The simulated (red) and experimental (black) PXRD patterns of **1-5**.



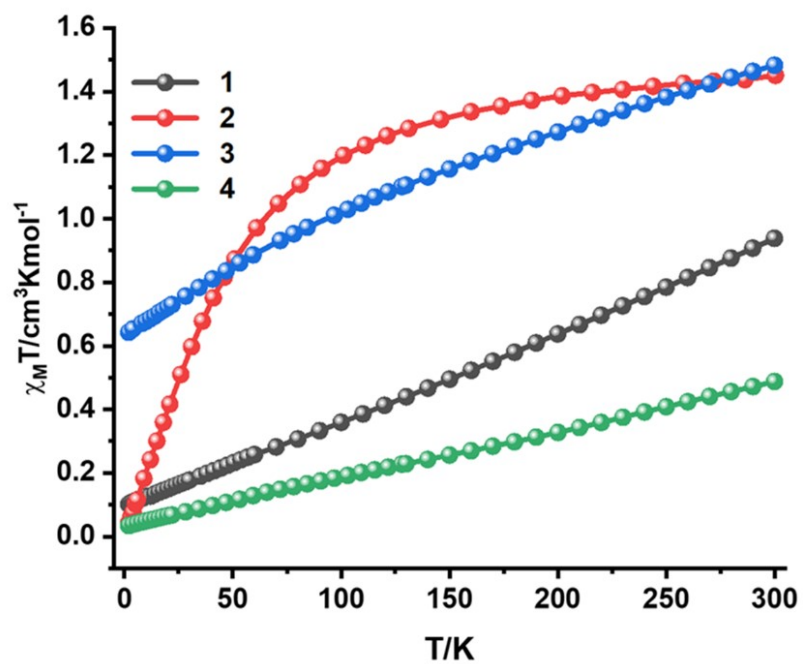

**Figure S12:** The temperature-dependence of magnetization data for 1-4 for the temperature range of 2 K to 300 K in presence of 0.1T magnetic field.

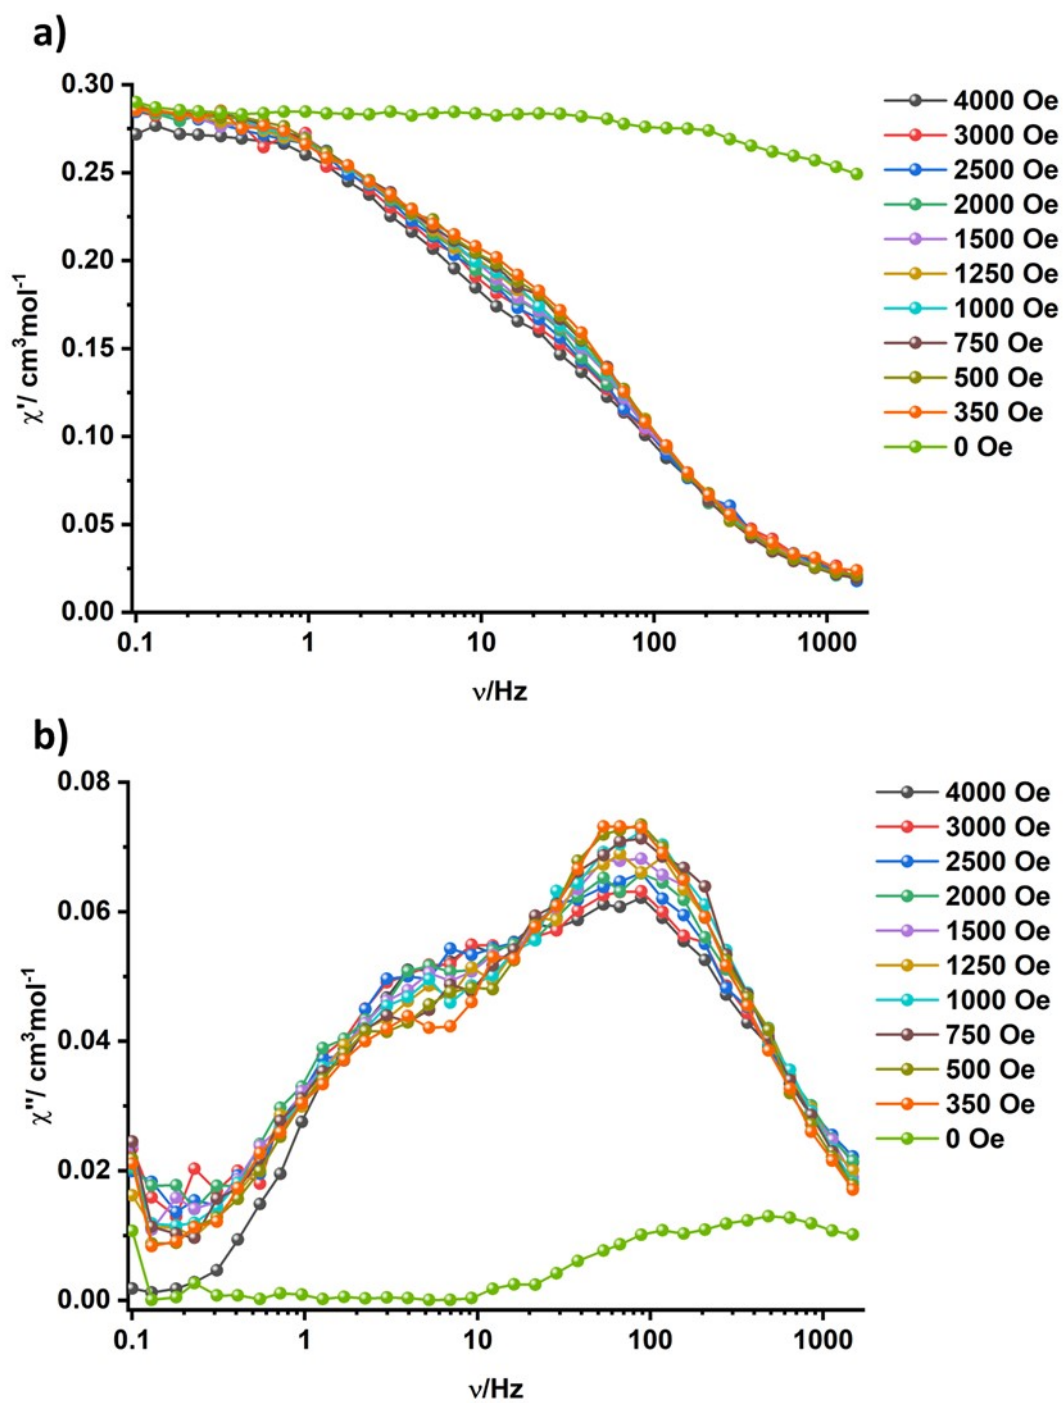

**Figure S13:** Frequency dependence (a) in phase and (b) out-of-phase magnetic susceptibility signals of **1** at 1.8 K in the presence of different indicated external magnetic fields of range 0-4000 Oe.

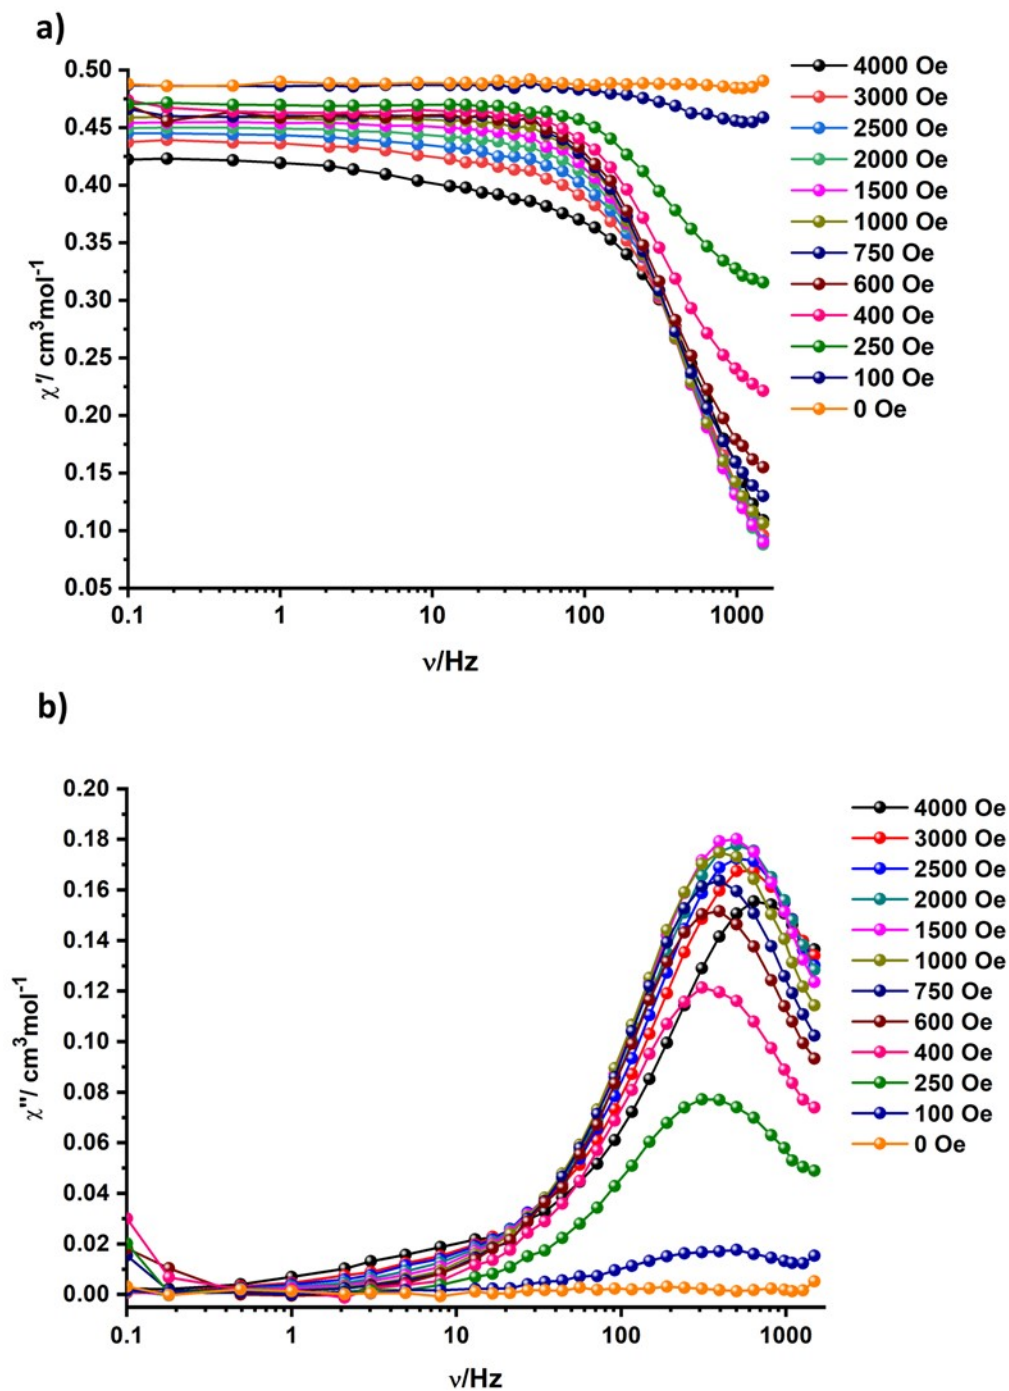

**Figure S14:** Frequency dependence (a) in phase and (b) out-of-phase magnetic susceptibility signals of **3** at 1.8 for in the presence of different indicated external magnetic fields of range 0-4000 Oe.

**Table S9:** Relaxation fitting parameters from the least-square fitting of the Cole-Cole plots of compound **1** under 350 Oe dc field according to the modified Debye model considering two relaxation processes.

| T/K | $\tau_1$ | $\tau_{1\_err}$ | $D\chi_1$<br>(cm <sup>3</sup> /mol) | $D\chi_{1\_err}$<br>(cm <sup>3</sup> /mol) | $\alpha_1$ | $\alpha_{1\_err}$ | $\tau_2$ | $\tau_{2\_err}$ | $D\chi_2$<br>(cm <sup>3</sup> /mol) | $D\chi_{2\_err}$<br>(cm <sup>3</sup> /mol) | $\alpha_2$ | $\alpha_{2\_err}$ | $\chi_{total}$ | $\chi_{total\_err}$ |
|-----|----------|-----------------|-------------------------------------|--------------------------------------------|------------|-------------------|----------|-----------------|-------------------------------------|--------------------------------------------|------------|-------------------|----------------|---------------------|
| 1.8 | 6.94E-02 | 3.12E-03        | 8.73E-02                            | 4.00E-03                                   | 1.75E-01   | 1.97E-02          | 2.10E-03 | 4.91E-05        | 2.25E-01                            | 3.94E-03                                   | 2.28E-01   | 8.03E-03          | 1.76E-02       | 7.97E-04            |
| 2.1 | 4.89E-02 | 1.20E-03        | 6.79E-02                            | 1.94E-03                                   | 1.23E-01   | 1.19E-02          | 1.46E-03 | 2.21E-05        | 2.01E-01                            | 2.12E-03                                   | 2.57E-01   | 5.23E-03          | 1.28E-02       | 5.25E-04            |
| 2.4 | 3.30E-02 | 8.06E-04        | 5.95E-02                            | 1.75E-03                                   | 1.17E-01   | 1.14E-02          | 9.94E-04 | 1.56E-05        | 1.77E-01                            | 2.06E-03                                   | 2.61E-01   | 5.85E-03          | 1.09E-02       | 5.69E-04            |
| 2.7 | 2.23E-02 | 7.56E-04        | 5.21E-02                            | 2.22E-03                                   | 1.21E-01   | 1.47E-02          | 6.73E-04 | 1.44E-05        | 1.58E-01                            | 2.81E-03                                   | 2.71E-01   | 8.92E-03          | 9.81E-03       | 8.65E-04            |
| 3.0 | 1.25E-02 | 4.57E-04        | 5.36E-02                            | 2.22E-03                                   | 1.57E-01   | 1.21E-02          | 4.23E-04 | 8.74E-06        | 1.34E-01                            | 2.94E-03                                   | 2.48E-01   | 1.06E-02          | 1.00E-02       | 9.69E-04            |
| 3.3 | 8.45E-03 | 5.75E-04        | 5.36E-02                            | 3.44E-03                                   | 1.70E-01   | 2.01E-02          | 2.82E-04 | 8.61E-06        | 1.12E-01                            | 4.92E-03                                   | 1.87E-01   | 2.27E-02          | 1.48E-02       | 1.99E-03            |
| 3.6 | 5.74E-03 | 3.48E-04        | 4.73E-02                            | 3.13E-03                                   | 1.57E-01   | 1.76E-02          | 1.71E-04 | 5.09E-06        | 1.12E-01                            | 5.64E-03                                   | 2.23E-01   | 2.58E-02          | 6.07E-03       | 2.90E-03            |

**Table S10:** Relaxation fitting parameters from the least-square fitting of the Cole-Cole plots of compound **3** under 1.5 kOe dc field according to the generalized Debye model.

| <b>T/K</b> | $\chi_s$ | $\chi_r$ | $\tau$   | $\alpha$ |
|------------|----------|----------|----------|----------|
| 1.8        | 0.0332   | 0.562    | 3.32E-04 | 0.108    |
| 2.0        | 0.0295   | 0.507    | 2.45E-04 | 0.107    |
| 2.2        | 0.0262   | 0.467    | 1.91E-04 | 0.104    |
| 2.4        | 0.0232   | 0.426    | 1.43E-04 | 0.0954   |
| 2.6        | 0.0223   | 0.394    | 1.10E-04 | 0.0846   |

**Table S11:** The computed crystal field parameters (CFP) of complexes **1** and **3** and models **1a** and **3a**. The CFPs have been computed according to the Stevens Hamiltonian;

$$\hat{H}_{CF} = \sum_{k=2,4,6} \sum_{q=-k}^{q=+k} B_k^q \bar{O}_k^q$$

where  $B_k^q$  is the CFP and  $\bar{O}_k^q$  is the Stevens operator.

| k | q         | $B_k^q$          |                  |                  |                  |
|---|-----------|------------------|------------------|------------------|------------------|
|   |           | <b>1</b>         | <b>1a</b>        | <b>3</b>         | <b>3a</b>        |
| 2 | -2        | 5.51E+00         | -5.95E-01        | 1.55E+00         | 3.98E-01         |
|   | -1        | 4.21E+01         | -7.82E+01        | -9.90E-01        | -3.60E-01        |
|   | 0         | <b>-4.66E+01</b> | <b>-1.10E+02</b> | <b>-4.31E+00</b> | <b>-1.15E+01</b> |
|   | 1         | 6.17E+00         | 9.28E+00         | -1.40E+00        | 4.87E-01         |
|   | 2         | -8.97E+00        | 1.56E+01         | 1.23E+00         | 6.48E+00         |
| 4 | -4        | 1.52E+00         | -1.49E-01        | -2.12E-02        | 1.62E-02         |
|   | -3        | 2.84E+00         | 1.06E-01         | -2.79E-01        | -2.17E-01        |
|   | -2        | -6.16E-01        | -4.93E-01        | 1.71E-02         | 1.53E-02         |
|   | -1        | -4.97E+00        | 1.37E+01         | 8.15E-02         | -9.87E-02        |
|   | 0         | 2.97E-01         | 1.01E-02         | -2.44E-02        | -3.07E-02        |
|   | 1         | -1.58E+00        | -7.40E-01        | 4.83E-02         | -1.00E-02        |
|   | 2         | -2.41E+00        | 2.33E-02         | 7.83E-02         | 1.36E-01         |
|   | 3         | -8.86E+00        | 1.04E+00         | 6.65E-02         | -4.21E-02        |
| 4 | -2.64E+00 | 7.76E-01         | -6.86E-02        | -6.11E-02        |                  |
| 6 | -6        |                  |                  | -1.65E-02        | -9.12E-04        |
|   | -5        |                  |                  | 2.41E-02         | 1.56E-02         |
|   | -4        |                  |                  | 4.49E-03         | 1.79E-03         |
|   | -3        |                  |                  | 4.63E-03         | -1.02E-02        |
|   | -2        |                  |                  | -1.50E-03        | 1.48E-03         |
|   | -1        |                  |                  | 2.35E-03         | -7.68E-03        |
|   | 0         |                  |                  | -8.72E-04        | -9.17E-04        |
|   | 1         |                  |                  | -4.57E-04        | -2.62E-03        |
|   | 2         |                  |                  | 1.08E-03         | 6.63E-03         |
|   | 3         |                  |                  | 1.26E-02         | 4.68E-04         |
|   | 4         |                  |                  | -3.26E-03        | -7.14E-03        |
| 5 |           |                  | -6.60E-02        | 5.21E-03         |                  |
| 6 |           |                  | 1.21E-03         | 2.40E-03         |                  |



**Table S12:** The computed LoProp charge of metal and its coordinated atoms in complexes **1** and **3**.

| Complex 1 |         | Complex 3 |         |
|-----------|---------|-----------|---------|
| Ce        | 2.5058  | Nd        | 2.5296  |
| O(P)      | -1.1288 | O(P)      | -1.1346 |
| O(P)      | -1.1171 | O(P)      | -1.1237 |
| O(P)      | -0.7648 | O(P)      | -0.7693 |
| O(Crown)  | -0.5290 | O(Crown)  | -0.5329 |
| O(Crown)  | -0.5140 | O(Crown)  | -0.5167 |
| O(Crown)  | -0.5103 | O(Crown)  | -0.5136 |
| O(Crown)  | -0.4908 | O(Crown)  | -0.4934 |
| O(Crown)  | -0.4857 | O(Crown)  | -0.4882 |
| O(Crown)  | -0.4920 | O(Crown)  | -0.4945 |

**Table S13.** The CASSCF/RASSI-SO/SINGLE\_ANISO calculated g tensor, m<sub>j</sub> composition and g<sub>zz</sub> angles of three ground state KDs of **1a**.

| Energy (cm <sup>-1</sup> ) | g <sub>x</sub> | g <sub>y</sub> | g <sub>z</sub> | m <sub>j</sub> composition | Angle between g <sub>zz</sub> of higher KDs with KD1 (°) |
|----------------------------|----------------|----------------|----------------|----------------------------|----------------------------------------------------------|
| 0.0                        | 0.063          | 0.134          | 4.089          | 1.00 ±5/2>                 |                                                          |
| 1128.2                     | 0.745          | 1.390          | 2.094          | 0.82 ±3/2>+0.18 ±1/2>      | 7.083                                                    |
| 2179.1                     | 1.204          | 1.092          | 3.062          | 0.82 ±1/2>+0.18 ±3/2>      | 93.960                                                   |

**Table S14.** The CASSCF/RASSI-SO/SINGLE\_ANISO calculated g tensor, m<sub>j</sub> composition and g<sub>zz</sub> angles of three ground state KDs of **3a**.

| Energy (cm <sup>-1</sup> ) | g <sub>x</sub> | g <sub>y</sub> | g <sub>z</sub> | m <sub>j</sub> composition       | Angle between g <sub>zz</sub> of higher KDs with KD1 (°) |
|----------------------------|----------------|----------------|----------------|----------------------------------|----------------------------------------------------------|
| 0.0                        | 0.049          | 0.062          | 6.096          | 0.94 ±9/2>+0.04 ±5/2>            |                                                          |
| 449.6                      | 0.340          | 0.398          | 4.913          | 0.84 ±7/2>+0.09 ±5/2>+0.05 ±3/2> | 22.587                                                   |
| 601.8                      | 1.185          | 1.492          | 4.266          | 0.71 ±5/2>+0.17 ±3/2>+0.07 ±1/2> | 53.861                                                   |
| 680.4                      | 0.751          | 1.609          | 3.591          | 0.55 ±3/2>+0.15 ±1/2>+0.15 ±7/2> | 63.542                                                   |
| 830.3                      | 0.335          | 0.851          | 6.076          | 0.75 ±1/2>+0.22 ±3/2>            | 91.254                                                   |

## References:

1. Llundell, M.; Casanova, D.; Cirera, J.; Alemany, P.; Alvarez, S., SHAPE, version 2.1. *Universitat de Barcelona, Barcelona, Spain* **2013**, 2103.
